# Supplementary material for: Cost Effectiveness of Mirabegron Compared with Tolterodine Extended Release for the Treatment of Adults with Overactive Bladder in the United Kingdom
Source: PubMed Central journal article supplement — Clin Drug Investig. 2014 Dec 10;35(2):83–93. doi: 10.1007/s40261-014-0240-z (PMC4300413; doi:10.1007/s40261-014-0240-z), 2014-12-10
Supplement: 40261_2014_240_MOESM1_ESM.pdf [file 40261_2014_240_MOESM1_ESM.pdf]

## **ELECTRONIC SUPPLEMENTARY MATERIAL**

### **Cost Effectiveness of Mirabegron Compared with Tolterodine Extended Release for the Treatment of Adults with Overactive Bladder in the United Kingdom**

Samuel Aballéa,<sup>1</sup> Khaled Maman,<sup>2</sup> Katia Thokagevistik,<sup>1</sup> Jameel Nazir,<sup>3</sup> Isaac A.O. Odeyemi,<sup>3</sup> Zalmi Hakimi,<sup>4</sup> Andy Garnham,<sup>3</sup> Mondher Toumi<sup>1</sup>

**Model structure for the general OAB population**

**Supplementary Figure 1.** Transitions for the general population before BTX initiation

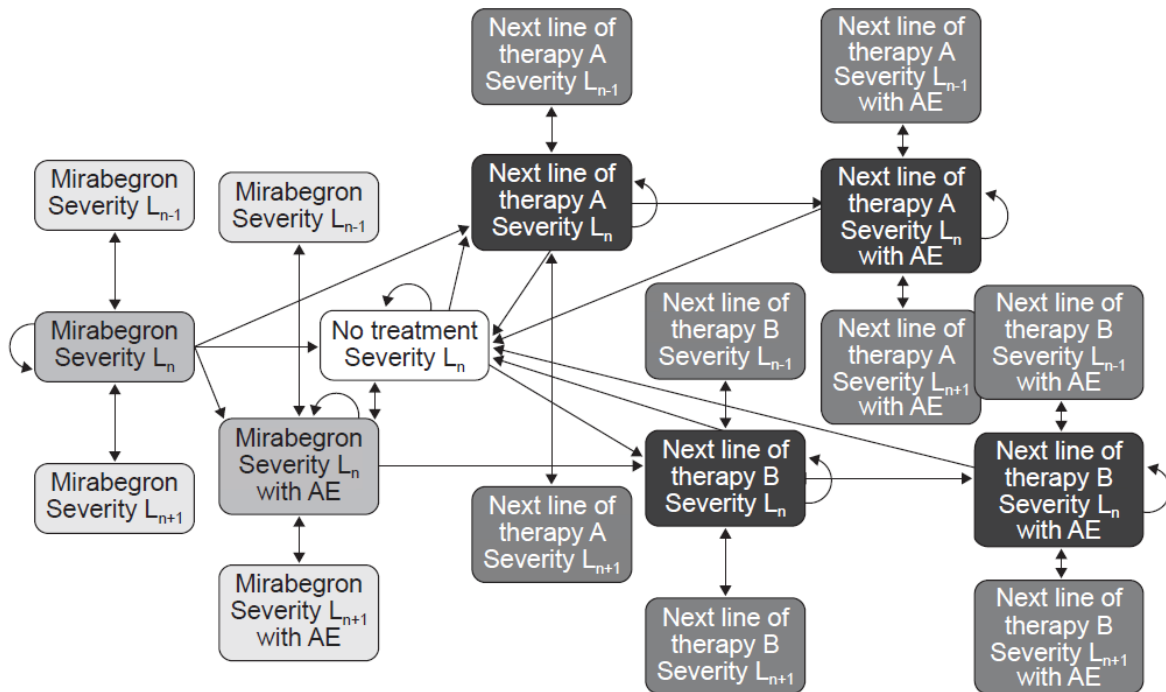

The model simulates in parallel the evolution of two symptom types: micturitions and incontinence. For each of these symptoms, five levels of severity are defined.

**Input parameters**

| <b>Supplementary Table 1. Input parameters for base case model: general OAB population - mirabegron 50 mg vs tolterodine ER 4 mg</b>             |                        |                   |                                                                                                                     |                                                                                                        |
|--------------------------------------------------------------------------------------------------------------------------------------------------|------------------------|-------------------|---------------------------------------------------------------------------------------------------------------------|--------------------------------------------------------------------------------------------------------|
| <b>Parameter</b>                                                                                                                                 | <b>Base case value</b> | <b>DSA values</b> | <b>PSA</b>                                                                                                          | <b>Source</b>                                                                                          |
| <b>Statistical distributions for proportions of patients by severity level at baseline - General OAB population</b>                              |                        |                   |                                                                                                                     |                                                                                                        |
| Micturition 1                                                                                                                                    | 6.30%                  | 0% - 0%           | Dirichlet distribution <sup>1</sup><br>( $\alpha_1, \alpha_2, \alpha_3, \alpha_4, \alpha_5$ )=(120,585,518,371,312) | Base case / PSA: SCORPIO based on pooled data from the 3 treatment arms at baseline<br>DSA: assumption |
| Micturition 2                                                                                                                                    | 30.69%                 | 100% - 0%         |                                                                                                                     |                                                                                                        |
| Micturition 3                                                                                                                                    | 27.18%                 | 0% - 0%           |                                                                                                                     |                                                                                                        |
| Micturition 4                                                                                                                                    | 19.46%                 | 0% - 0%           |                                                                                                                     |                                                                                                        |
| Micturition 5                                                                                                                                    | 16.37%                 | 0% - 100%         |                                                                                                                     |                                                                                                        |
| Incontinence 1                                                                                                                                   | 38.87%                 | 100% - 0%         | Dirichlet distribution<br>( $\alpha_1, \alpha_2, \alpha_3, \alpha_4, \alpha_5$ )=(741,359,279,175,352)              |                                                                                                        |
| Incontinence 2                                                                                                                                   | 18.84%                 | 0% - 0%           |                                                                                                                     |                                                                                                        |
| Incontinence 3                                                                                                                                   | 14.64%                 | 0% - 0%           |                                                                                                                     |                                                                                                        |
| Incontinence 4                                                                                                                                   | 9.18%                  | 0% - 0%           |                                                                                                                     |                                                                                                        |
| Incontinence 5                                                                                                                                   | 18.47%                 | 0% - 100%         |                                                                                                                     |                                                                                                        |
| <b>Probabilities of transition between different severity levels, by treatment - for Mirabegron 50 mg, Tolterodine ER 4 mg, Solifenacin 5 mg</b> |                        |                   |                                                                                                                     |                                                                                                        |
| <b>Beta coefficients for Mirabegron 50 mg</b>                                                                                                    |                        |                   |                                                                                                                     |                                                                                                        |
| Micturition 1 (5 as reference)                                                                                                                   | 0.6037                 | 0.2239 – 0.9835   | Normal distribution <sup>2</sup> ( $\mu, \sigma$ )=(0.6037,0.1938)                                                  | Base case / PSA: SCORPIO<br>DSA: 95% CI assuming normal distribution                                   |
| Micturition 2 (5 as reference)                                                                                                                   | 0.3803                 | 0.0295 – 0.7311   | Normal distribution ( $\mu, \sigma$ )=(0.3803,0.1790)                                                               |                                                                                                        |
| Micturition 3 (5 as reference)                                                                                                                   | 0.1454                 | -0.1876 – 0.4784  | Normal distribution ( $\mu, \sigma$ )=(0.1454,0.1699)                                                               |                                                                                                        |
| Micturition 4 (5 as reference)                                                                                                                   | 0.0665                 | -0.2738 – 0.4068  | Normal distribution ( $\mu, \sigma$ )=(0.0665,0.1736)                                                               |                                                                                                        |
| Incontinence 1 (5 as reference)                                                                                                                  | 0.3617                 | 0.0054 – 0.7180   | Normal distribution ( $\mu, \sigma$ )=(0.3617,0.1818)                                                               |                                                                                                        |
| Incontinence 2 (5 as reference)                                                                                                                  | 0.4634                 | 0.1043 – 0.8225   | Normal distribution ( $\mu, \sigma$ )=(0.4634,0.1832)                                                               |                                                                                                        |
| Incontinence 3 (5 as reference)                                                                                                                  | -0.0251                | -0.4042 – 0.3540  | Normal distribution ( $\mu, \sigma$ )=(-0.0251,0.1934)                                                              |                                                                                                        |
| Incontinence 4 (5 as reference)                                                                                                                  | 0.2040                 | -0.2119 – 0.6199  | Normal distribution ( $\mu, \sigma$ )=(0.2040,0.2122)                                                               |                                                                                                        |
| <b>Beta coefficients for Tolterodine ER 4 mg</b>                                                                                                 |                        |                   |                                                                                                                     |                                                                                                        |
| Micturition 1 (5 as reference)                                                                                                                   | 0.3667                 | -0.0073 – 0.7407  | Normal distribution ( $\mu, \sigma$ )=( 0.3667,0.1908)                                                              | Base case / PSA: SCORPIO<br>DSA: 95% CI assuming normal distribution                                   |
| Micturition 2 (5 as reference)                                                                                                                   | 0.1826                 | -0.1610 – 0.5262  | Normal distribution ( $\mu, \sigma$ )=( 0.1826,0.1753)                                                              |                                                                                                        |
| Micturition 3 (5 as reference)                                                                                                                   | -0.0609                | -0.3867 – 0.2649  | Normal distribution ( $\mu, \sigma$ )=(- 0.0609,0.1662)                                                             |                                                                                                        |
| Micturition 4 (5 as reference)                                                                                                                   | 0.0550                 | -0.2739 – 0.3839  | Normal distribution ( $\mu, \sigma$ )=( 0.0550,0.1678)                                                              |                                                                                                        |

<sup>1</sup> Dirichlet distributions were used to model uncertainty of proportions with >2 categories as it is a multivariate generalisation of the beta distribution. [Briggs 2006]

<sup>2</sup> Normal distributions were the natural choice for coefficients obtained by regression, with the mean and standard deviation as parameters.

| <b>Supplementary Table 1.</b> Input parameters for base case model: general OAB population - mirabegron 50 mg vs tolterodine ER 4 mg |                 |                  |                                                                   |                                                                                                                                                                                         |
|--------------------------------------------------------------------------------------------------------------------------------------|-----------------|------------------|-------------------------------------------------------------------|-----------------------------------------------------------------------------------------------------------------------------------------------------------------------------------------|
| Parameter                                                                                                                            | Base case value | DSA values       | PSA                                                               | Source                                                                                                                                                                                  |
| Incontinence 1 (5 as reference)                                                                                                      | 0.1431          | -0.2028 – 0.4890 | Normal distribution ( $\mu, \sigma$ )=( 0.1431,0.1765)            |                                                                                                                                                                                         |
| Incontinence 2 (5 as reference)                                                                                                      | 0.1768          | -0.1735 – 0.5271 | Normal distribution ( $\mu, \sigma$ )=( 0.1768,0.1787)            |                                                                                                                                                                                         |
| Incontinence 3 (5 as reference)                                                                                                      | -0.3271         | -0.7009 – 0.0467 | Normal distribution ( $\mu, \sigma$ )=( -0.3271,0.1907)           |                                                                                                                                                                                         |
| Incontinence 4 (5 as reference)                                                                                                      | -0.0298         | -0.4385 – 0.3789 | Normal distribution ( $\mu, \sigma$ )=( -0.0298,0.2085)           |                                                                                                                                                                                         |
| <b>Beta coefficients for Solifenacin 5 mg</b>                                                                                        |                 |                  |                                                                   |                                                                                                                                                                                         |
| Micturition 1 (5 as reference)                                                                                                       | 0,9977          | 0,6237 – 1.3717  | Normal distribution ( $\mu, \sigma$ )=(0,9977,0,1908)             | MTC based on SCORPIO and calibration method (calibration following the seven-step approach defined by Vanni, 2011)<br>Initial betas for the calibration were those for mirabegron 50 mg |
| Micturition 2 (5 as reference)                                                                                                       | 0,4933          | 0,1497 – 0.8639  | Normal distribution ( $\mu, \sigma$ )=(0,4933,0,1753)             |                                                                                                                                                                                         |
| Micturition 3 (5 as reference)                                                                                                       | 0,0384          | 0,3641 - -0.2874 | Normal distribution ( $\mu, \sigma$ )=(0,0384,0,1662)             |                                                                                                                                                                                         |
| Micturition 4 (5 as reference)                                                                                                       | -0,0729         | 0,2560 - -0.4017 | Normal distribution ( $\mu, \sigma$ )=( -0,0729,0,1678)           |                                                                                                                                                                                         |
| Incontinence 1 (5 as reference)                                                                                                      | 1,1403          | 0,7944 – 1.4863  | Normal distribution ( $\mu, \sigma$ )=(1,1403,0,1765)             |                                                                                                                                                                                         |
| Incontinence 2 (5 as reference)                                                                                                      | 0,7343          | 0,3840 – 1.0845  | Normal distribution ( $\mu, \sigma$ )=(0,7343,0,1787)             |                                                                                                                                                                                         |
| Incontinence 3 (5 as reference)                                                                                                      | 0,0347          | 0,4084 - -0.3391 | Normal distribution ( $\mu, \sigma$ )=(0,0347,0,1907)             |                                                                                                                                                                                         |
| Incontinence 4 (5 as reference)                                                                                                      | 0,1136          | 0,5223 - -0.2950 | Normal distribution ( $\mu, \sigma$ )=(0,1136,0,2085)             |                                                                                                                                                                                         |
| <b>Probability of having a dry mouth AE</b>                                                                                          |                 |                  |                                                                   |                                                                                                                                                                                         |
| Mirabegron 50 mg                                                                                                                     | 2.80%           | 2.1% - 3.5%      | Beta distribution <sup>3</sup> ( $\alpha,\beta$ )=(47.60,1652.40) | Base case / PSA: SCORPIO<br>DSA: 95% CI                                                                                                                                                 |
| Tolterodine 4 mg                                                                                                                     | 10.10%          | 8.7% - 11.5%     | Beta distribution ( $\alpha,\beta$ )=(113.12,1006.86)             |                                                                                                                                                                                         |
| No treatment                                                                                                                         | 0%              | NA               | NA                                                                | Assumption                                                                                                                                                                              |
| <b>Probability of having a constipation AE</b>                                                                                       |                 |                  |                                                                   |                                                                                                                                                                                         |
| Mirabegron 50 mg                                                                                                                     | 1.60%           | 1% - 2.20%       | NA                                                                | Base case / PSA: SCORPIO<br>DSA: 95% CI                                                                                                                                                 |
| Tolterodine 4 mg                                                                                                                     | 2%              | 1.40% - 2.60%    | NA                                                                |                                                                                                                                                                                         |
| No treatment                                                                                                                         | 0%              | NA               | NA                                                                | Assumption                                                                                                                                                                              |
| <b>Probability of success of botulinum toxin (all patients)</b>                                                                      |                 |                  |                                                                   |                                                                                                                                                                                         |
|                                                                                                                                      | 79%             | 60% - 92%        | NA                                                                | Wu et al, 2009                                                                                                                                                                          |
| <b>Utilities according to symptom severity – EQ-5D (coefficients of regression equation)</b>                                         |                 |                  |                                                                   |                                                                                                                                                                                         |
| Micturition 1 (5 as reference)                                                                                                       | 0.0632          | 0.0453 – 0.0811  | Normal distribution ( $\mu, \sigma$ )=( 0.0632,0.0091)            | Base case/PSA: SCORPIO                                                                                                                                                                  |
| Micturition 2 (5 as reference)                                                                                                       | 0.0422          | 0.0258 – 0.0587  | Normal distribution ( $\mu, \sigma$ )=( 0.0422,0.0084)            |                                                                                                                                                                                         |

<sup>3</sup> Beta distribution were used to model uncertainty of event probabilities as it represents the distribution for a probability of a binomial process and is characterised by two parameters ( $\alpha,\beta$ ) corresponding to the number of events and the number of non-events. [Briggs 2006]

| <b>Supplementary Table 1. Input parameters for base case model: general OAB population - mirabegron 50 mg vs tolterodine ER 4 mg</b> |                        |                   |                                                        |                                                                                                                                                                                                                                     |
|--------------------------------------------------------------------------------------------------------------------------------------|------------------------|-------------------|--------------------------------------------------------|-------------------------------------------------------------------------------------------------------------------------------------------------------------------------------------------------------------------------------------|
| <b>Parameter</b>                                                                                                                     | <b>Base case value</b> | <b>DSA values</b> | <b>PSA</b>                                             | <b>Source</b>                                                                                                                                                                                                                       |
| Micturition 3 (5 as reference)                                                                                                       | 0.0204                 | 0.0045 – 0.0363   | Normal distribution ( $\mu, \sigma$ )=( 0.0204,0.0081) | DSA: 95% CI assuming normal distribution                                                                                                                                                                                            |
| Micturition 4 (5 as reference)                                                                                                       | 0.0104                 | -0.0054 – 0.0262  | Normal distribution ( $\mu, \sigma$ )=( 0.0104,0.0081) |                                                                                                                                                                                                                                     |
| Incontinence 1 (5 as reference)                                                                                                      | 0.0586                 | 0.0422 – 0.0749   | Normal distribution ( $\mu, \sigma$ )=( 0.0586,0.0083) |                                                                                                                                                                                                                                     |
| Incontinence 2 (5 as reference)                                                                                                      | 0.0437                 | 0.0271 – 0.0602   | Normal distribution ( $\mu, \sigma$ )=( 0.0437,0.0084) |                                                                                                                                                                                                                                     |
| Incontinence 3 (5 as reference)                                                                                                      | 0.0314                 | 0.0142 – 0.0486   | Normal distribution ( $\mu, \sigma$ )=( 0.0314,0.0088) |                                                                                                                                                                                                                                     |
| Incontinence 4 (5 as reference)                                                                                                      | 0.0128                 | -0.0056 – 0.0313  | Normal distribution ( $\mu, \sigma$ )=( 0.0128,0.0094) |                                                                                                                                                                                                                                     |
| <b>Utilities according to symptom severity – OAB-5D (coefficients of regression equation)</b>                                        |                        |                   |                                                        |                                                                                                                                                                                                                                     |
| Micturition 1 (5 as reference)                                                                                                       | 0.0988                 | 0.0919 – 0.1057   | Normal distribution ( $\mu, \sigma$ )=( 0.0988,0.0035) | Base case/PSA: SCORPIO<br>DSA: 95% CI assuming normal distribution                                                                                                                                                                  |
| Micturition 2 (5 as reference)                                                                                                       | 0.0620                 | 0.0556 – 0.0683   | Normal distribution ( $\mu, \sigma$ )=( 0.0620,0.0033) |                                                                                                                                                                                                                                     |
| Micturition 3 (5 as reference)                                                                                                       | 0.0353                 | 0.0292 – 0.0415   | Normal distribution ( $\mu, \sigma$ )=( 0.0353,0.0031) |                                                                                                                                                                                                                                     |
| Micturition 4 (5 as reference)                                                                                                       | 0.0185                 | 0.0123 – 0.0246   | Normal distribution ( $\mu, \sigma$ )=( 0.0185,0.0031) |                                                                                                                                                                                                                                     |
| Incontinence 1 (5 as reference)                                                                                                      | 0.0777                 | 0.0714 – 0.0840   | Normal distribution ( $\mu, \sigma$ )=( 0.0777,0.0032) |                                                                                                                                                                                                                                     |
| Incontinence 2 (5 as reference)                                                                                                      | 0.0511                 | 0.0447 – 0.0575   | Normal distribution ( $\mu, \sigma$ )=( 0.0511,0.0033) |                                                                                                                                                                                                                                     |
| Incontinence 3 (5 as reference)                                                                                                      | 0.0246                 | 0.0179 – 0.0313   | Normal distribution ( $\mu, \sigma$ )=( 0.0246,0.0034) |                                                                                                                                                                                                                                     |
| Incontinence 4 (5 as reference)                                                                                                      | 0.0094                 | 0.0022 – 0.0166   | Normal distribution ( $\mu, \sigma$ )=( 0.0094,0.0037) |                                                                                                                                                                                                                                     |
| <b>Utility decrement associated with AE</b>                                                                                          |                        |                   |                                                        |                                                                                                                                                                                                                                     |
| All AE                                                                                                                               | -0.0357                | 0 - -0.1          | NA                                                     | Base case: SCORPIO<br>SA: Assumption                                                                                                                                                                                                |
| <b>Pad use per day by level of incontinence (coefficients of linear regression equation)</b>                                         |                        |                   |                                                        |                                                                                                                                                                                                                                     |
| Incontinence 1                                                                                                                       | 0.17                   | 0.150 – 0.198     | NA                                                     | Base case: SCORPIO<br>SA: 95% CI assuming normal distribution                                                                                                                                                                       |
| Incontinence 2                                                                                                                       | 0.75                   | 0.687 – 0.817     | NA                                                     |                                                                                                                                                                                                                                     |
| Incontinence 3                                                                                                                       | 1.38                   | 1.282 – 1.486     | NA                                                     |                                                                                                                                                                                                                                     |
| Incontinence 4                                                                                                                       | 1.89                   | 1.745 – 2.039     | NA                                                     |                                                                                                                                                                                                                                     |
| Incontinence 5                                                                                                                       | 3.34                   | 3.167 – 3.511     | NA                                                     |                                                                                                                                                                                                                                     |
| <b>Monthly probability of discontinuation of OAB therapy</b>                                                                         |                        |                   |                                                        |                                                                                                                                                                                                                                     |
| Without AEs                                                                                                                          | 6.40%                  | 3.0% - 14.5%      | NA                                                     | Base case: 28.2% of patients on tolterodine ER persistent at 12 months (Wagg et al. 2012), N=1,758; 24% of discontinuations are due to AEs (Sánchez-Ballester et al. 2014)<br>SA: Estimate based on mean duration of treatment with |

| <b>Supplementary Table 1.</b> Input parameters for base case model: general OAB population - mirabegron 50 mg vs tolterodine ER 4 mg |                                             |              |                                                                 |                                                                                                        |
|--------------------------------------------------------------------------------------------------------------------------------------|---------------------------------------------|--------------|-----------------------------------------------------------------|--------------------------------------------------------------------------------------------------------|
| Parameter                                                                                                                            | Base case value                             | DSA values   | PSA                                                             | Source                                                                                                 |
|                                                                                                                                      |                                             |              |                                                                 | tolterodine (156.7 days) instead of persistence rate at 12 months (Wagg et al, 2012)<br>SA: Assumption |
| With AEs                                                                                                                             | 90%                                         | 50% - 100%   | Beta distribution ( $\alpha, \beta$ )=(6.92,0.77)               | Base case and SA: Assumption                                                                           |
| <b>Monthly probability of switch after discontinuation of OAB therapy</b>                                                            |                                             |              |                                                                 |                                                                                                        |
| Probability of switch, among all patients discontinuing OAB treatment                                                                | 26.06%                                      | 15.32% - 50% | Beta distribution                                               | Base case: Odeyemi et al, 2006                                                                         |
|                                                                                                                                      |                                             |              |                                                                 | SA: D'Souza et al, 2008 / Assumption                                                                   |
| <b>Monthly probabilities of restarting OAB therapy among patients without treatment</b>                                              |                                             |              |                                                                 |                                                                                                        |
| Monthly probability of restarting treatment                                                                                          | 10%                                         | 0.05% - 20%  | Beta distribution ( $\alpha, \beta$ )=(1.74, 15.63)             | Base case and SA: Assumption                                                                           |
| Split between different medications, for general OAB population*                                                                     |                                             |              |                                                                 |                                                                                                        |
| - Initial treatment (mirabegron or tolterodine)                                                                                      | 33.33%                                      | 0% - 50%     | NA                                                              | Base case and SA: Assumption                                                                           |
| - Next line A                                                                                                                        | 33.33%                                      | 0% - 50%     | NA                                                              | Base case and SA: Assumption                                                                           |
| - Next line B                                                                                                                        | 33.33%                                      | 0% - 50%     | NA                                                              | Base case and SA: Assumption                                                                           |
| <b>Monthly probability of transition to botulinum toxin</b>                                                                          |                                             |              |                                                                 |                                                                                                        |
| Monthly probability of having botulinum toxin injection in the general OAB population                                                | 0.01%                                       | 0% - 0.05%   | Beta distribution ( $\alpha, \beta$ )= (0.70,834.78)            | Base case and SA: Assumption                                                                           |
| <b>Resource utilisation (physician visits and botulinum toxin reinjections)</b>                                                      |                                             |              |                                                                 |                                                                                                        |
| Number of GP consultations                                                                                                           | 1 visit at the start and at every switch    | 0 - 2        | Lognormal distribution ( $\mu, \sigma$ ) <sup>4</sup> =(1,0.20) | Base case: Cardozo 2010<br>SA: Assumption                                                              |
| Number of specialist consultations                                                                                                   | 1.5 visits at the start and at every switch | 1 - 3        | Lognormal distribution ( $\mu, \sigma$ )=( 1.5,0.95)            | Base case: Cardozo 2010<br>SA: Assumption                                                              |
| Number of Botulinum toxin reinjections, following success of first injection                                                         | 0.17 per month                              | 0            | NA                                                              | Base case: Expert opinion (Once every 6 months)<br>SA: Assumption                                      |
| <b>Model inputs: Monthly OAB medication costs</b>                                                                                    |                                             |              |                                                                 |                                                                                                        |
| Mirabegron 50 mg                                                                                                                     | £29.40                                      | NA           | NA                                                              | BNF 2011/12                                                                                            |
| Tolterodine 4 mg ER                                                                                                                  | £28.01                                      | NA           | NA                                                              | BNF 2011/12                                                                                            |

<sup>4</sup> Lognormal distributions were used to model uncertainty of quantities that have a distribution skewed to the right (number of GP and specialist visits ) [Briggs 2012]

| <b>Supplementary Table 1.</b> Input parameters for base case model: general OAB population - mirabegron 50 mg vs tolterodine ER 4 mg |                 |            |    |     |                                                                                                                                                                                           |
|--------------------------------------------------------------------------------------------------------------------------------------|-----------------|------------|----|-----|-------------------------------------------------------------------------------------------------------------------------------------------------------------------------------------------|
| Parameter                                                                                                                            | Base case value | DSA values |    | PSA | Source                                                                                                                                                                                    |
| Solifenacin 5 mg                                                                                                                     | £28.00          | NA         |    | NA  | BNF 2011/12                                                                                                                                                                               |
| <b>Model inputs: unit costs of health care resources</b>                                                                             |                 |            |    |     |                                                                                                                                                                                           |
| GP consultation                                                                                                                      | £36             | NA         |    | NA  | PSSRU 2011                                                                                                                                                                                |
| Specialist visit: Follow-up visit                                                                                                    | £96             | NA         |    | NA  | NHS Payment 2010-2011                                                                                                                                                                     |
| Botulinum toxin injection: Initial / Reinjections                                                                                    | £1158 / £964    | NA         |    | NA  | <a href="http://www.nottinghamurologygroup.co.uk/treatments/bladder-botulinum-toxin-injections">http://www.nottinghamurologygroup.co.uk/treatments/bladder-botulinum-toxin-injections</a> |
| Incontinence pad (per pad)                                                                                                           | £0.16           | NA         |    | NA  | Age UK incontinence                                                                                                                                                                       |
| <b>Discount rates</b>                                                                                                                |                 |            |    |     |                                                                                                                                                                                           |
| Costs                                                                                                                                | 3.5%            | 0%         | 6% | NA  | NICE guidelines                                                                                                                                                                           |
| Outcomes (QALYs)                                                                                                                     | 3.5%            | 0%         | 6% | NA  |                                                                                                                                                                                           |

#### References not included in main manuscript

Briggs A, Claxton K, Sculpher M. Decision modelling for health economic evaluation. Oxford University Press, 2006.

Briggs AH, Weinstein MC, Fenwick EAL, Karnon J, Sculpher MJ, Paltiel AD. Model parameter estimation and uncertainty: a report of the ISPOR-SMDM modeling good research practices task force-6. Value Health 2012;1:835-42.

Vanni T, Karnon J, Madan J, White RG, Edmunds WJ, Foss AM et al. Calibrating models in economic evaluation: a seven-step approach. Pharmacoeconomics 2011;29:35-49.

### **Transitions between severity levels: logistic regression**

Probabilities of transition between severity levels for each symptom were obtained from a multinomial logistic regression model based on CL-046 clinical trial data. The probability of being at symptom level  $j$  at month  $(t+1)$  was expressed as a function of treatment, symptom severity in previous month  $(t)$ , sex and age:

$$Prob(Severity_{t+1} = j | x) = \frac{e^{\beta_0^j + \beta_1^j \cdot Treatment + \beta_2^j \cdot Severity_t + \beta_3^j \cdot Sex + \beta_4^j \cdot Age + \beta_5^j \cdot Treatment * Severity_t}}{1 + \sum_{k=1}^{J-1} e^{\beta_0^k + \beta_1^k \cdot Treatment + \beta_2^k \cdot Severity_t + \beta_3^k \cdot Sex + \beta_4^k \cdot Age + \beta_5^k \cdot Treatment * Severity_t}}$$

The log odds of being at a symptom level lower than  $j$  rather than greater than  $j$  are as following:

$$\text{Log} \left( \frac{Prob(Severity_{t+1} \leq j | x)}{Prob(Severity_{t+1} > j | x)} \right) = \beta_0^j + \beta_1^j \cdot Treatment + \beta_2^j \cdot Severity_t + \beta_3^j \cdot Sex + \beta_4^j \cdot Age + \beta_5^j \cdot Treatment * Severity_t$$

If the test of the proportional odds assumption is not rejected, an ordinal logistic regression can be used. This assumption is that the effects of any explanatory variables (here treatment, severity in previous month, sex and age) are consistent across different pairs of symptom levels. In other words, that the explanatory variables have the same effect on the odds regardless of the cut-off level:

$$\begin{aligned} \text{Log} \left( \frac{Prob(Severity_{t+1} \leq j | x)}{Prob(Severity_{t+1} > j | x)} \right) \\ = \beta_0^j + \beta_1 \cdot Treatment + \beta_2 \cdot Severity_t + \beta_3 \cdot Sex + \beta_4 \cdot Age + \beta_5 \cdot Treatment * Severity_t \end{aligned}$$

In the defined model, the null hypothesis of the proportional odds assumption was rejected, so the Ordinal Logistic Regression was not used.

The interaction between the treatment and the severity was also tested and appeared not significant.

Consequently the final equation to compute the transition probabilities was:

$$Prob(Severity_{t+1} = j | x) = \frac{e^{\beta_0^j + \beta_1^j \cdot Treatment + \beta_2^j \cdot Severity_t + \beta_3^j \cdot Sex + \beta_4^j \cdot Age}}{1 + \sum_{k=1}^{J-1} e^{\beta_0^k + \beta_1^k \cdot Treatment + \beta_2^k \cdot Severity_t + \beta_3^k \cdot Sex + \beta_4^k \cdot Age}}$$

Using the multinomial logistic regression model described above, we produced three transition matrices (5x5) for each type of symptom, one for the transition between baseline and the first month, one between the first month and the second month, and finally one between the second month and the third month (Supplementary Tables 1 and 2). For patients staying on treatment beyond 3 months, the transition matrix from 2 to 3 months was reapplied for the cycle from 3 to 4 months and subsequent monthly cycles until discontinuation.



| <b>Supplementary Table 2.</b> Transition probabilities between micturition severity levels for the general OAB population based on logistic regression analysis of SCORPIO data |                           |       |       |       |       |
|---------------------------------------------------------------------------------------------------------------------------------------------------------------------------------|---------------------------|-------|-------|-------|-------|
| Starting severity level                                                                                                                                                         | Transition severity level |       |       |       |       |
|                                                                                                                                                                                 | 1                         | 2     | 3     | 4     | 5     |
| Mirabegron 50 mg: baseline to month 1                                                                                                                                           |                           |       |       |       |       |
| 1                                                                                                                                                                               | 0.805                     | 0.180 | 0.013 | 0.002 | 0.000 |
| 2                                                                                                                                                                               | 0.408                     | 0.465 | 0.113 | 0.012 | 0.002 |
| 3                                                                                                                                                                               | 0.160                     | 0.387 | 0.343 | 0.084 | 0.026 |
| 4                                                                                                                                                                               | 0.055                     | 0.202 | 0.368 | 0.251 | 0.124 |
| 5                                                                                                                                                                               | 0.030                     | 0.074 | 0.156 | 0.241 | 0.500 |
| Mirabegron 50 mg: month 1 to month 2                                                                                                                                            |                           |       |       |       |       |
| 1                                                                                                                                                                               | 0.761                     | 0.213 | 0.021 | 0.004 | 0.001 |
| 2                                                                                                                                                                               | 0.334                     | 0.476 | 0.162 | 0.023 | 0.004 |
| 3                                                                                                                                                                               | 0.107                     | 0.321 | 0.399 | 0.132 | 0.040 |
| 4                                                                                                                                                                               | 0.030                     | 0.138 | 0.352 | 0.323 | 0.157 |
| 5                                                                                                                                                                               | 0.014                     | 0.043 | 0.128 | 0.268 | 0.546 |
| Mirabegron 50 mg: month 2 to month 3                                                                                                                                            |                           |       |       |       |       |
| 1                                                                                                                                                                               | 0.734                     | 0.237 | 0.024 | 0.004 | 0.001 |
| 2                                                                                                                                                                               | 0.302                     | 0.497 | 0.175 | 0.021 | 0.005 |
| 3                                                                                                                                                                               | 0.094                     | 0.326 | 0.420 | 0.115 | 0.046 |
| 4                                                                                                                                                                               | 0.027                     | 0.140 | 0.372 | 0.282 | 0.179 |
| 5                                                                                                                                                                               | 0.012                     | 0.042 | 0.129 | 0.223 | 0.594 |
| Tolterodine 4 mg ER: baseline to month 1                                                                                                                                        |                           |       |       |       |       |
| 1                                                                                                                                                                               | 0.799                     | 0.186 | 0.013 | 0.002 | 0.000 |
| 2                                                                                                                                                                               | 0.397                     | 0.472 | 0.113 | 0.015 | 0.003 |

| <b>Supplementary Table 2.</b> Transition probabilities between micturition severity levels for the general OAB population based on logistic regression analysis of SCORPIO data |       |       |       |       |       |
|---------------------------------------------------------------------------------------------------------------------------------------------------------------------------------|-------|-------|-------|-------|-------|
| 3                                                                                                                                                                               | 0.152 | 0.381 | 0.335 | 0.100 | 0.031 |
| 4                                                                                                                                                                               | 0.050 | 0.188 | 0.340 | 0.281 | 0.141 |
| 5                                                                                                                                                                               | 0.025 | 0.064 | 0.133 | 0.251 | 0.527 |
| Tolterodine 4 mg ER: month 1 to month 2                                                                                                                                         |       |       |       |       |       |
| 1                                                                                                                                                                               | 0.754 | 0.219 | 0.021 | 0.005 | 0.001 |
| 2                                                                                                                                                                               | 0.324 | 0.480 | 0.162 | 0.028 | 0.005 |
| 3                                                                                                                                                                               | 0.100 | 0.312 | 0.385 | 0.155 | 0.048 |
| 4                                                                                                                                                                               | 0.027 | 0.126 | 0.319 | 0.355 | 0.175 |
| 5                                                                                                                                                                               | 0.011 | 0.037 | 0.109 | 0.275 | 0.568 |
| Tolterodine 4 mg ER: month 2 to month 3                                                                                                                                         |       |       |       |       |       |
| 1                                                                                                                                                                               | 0.726 | 0.243 | 0.024 | 0.005 | 0.001 |
| 2                                                                                                                                                                               | 0.293 | 0.501 | 0.175 | 0.025 | 0.006 |
| 3                                                                                                                                                                               | 0.088 | 0.317 | 0.405 | 0.135 | 0.055 |
| 4                                                                                                                                                                               | 0.024 | 0.128 | 0.337 | 0.311 | 0.200 |
| 5                                                                                                                                                                               | 0.004 | 0.020 | 0.086 | 0.243 | 0.646 |
| No treatment: n months to (n+1) months                                                                                                                                          |       |       |       |       |       |
| 1                                                                                                                                                                               | 0.063 | 0.307 | 0.272 | 0.195 | 0.164 |
| 2                                                                                                                                                                               | 0.063 | 0.307 | 0.272 | 0.195 | 0.164 |
| 3                                                                                                                                                                               | 0.063 | 0.307 | 0.272 | 0.195 | 0.164 |
| 4                                                                                                                                                                               | 0.063 | 0.307 | 0.272 | 0.195 | 0.164 |
| 5                                                                                                                                                                               | 0.063 | 0.307 | 0.272 | 0.195 | 0.164 |

| <b>Supplementary Table 3.</b> Transition probabilities between incontinence severity levels for the general OAB population based on logistic regression analysis of SCORPIO data |                           |       |       |       |       |
|----------------------------------------------------------------------------------------------------------------------------------------------------------------------------------|---------------------------|-------|-------|-------|-------|
| Starting severity level                                                                                                                                                          | Transition severity level |       |       |       |       |
|                                                                                                                                                                                  | 1                         | 2     | 3     | 4     | 5     |
| Mirabegron 50 mg: baseline to month 1                                                                                                                                            |                           |       |       |       |       |
| 1                                                                                                                                                                                | 0.879                     | 0.100 | 0.012 | 0.005 | 0.005 |
| 2                                                                                                                                                                                | 0.518                     | 0.364 | 0.078 | 0.022 | 0.018 |
| 3                                                                                                                                                                                | 0.348                     | 0.354 | 0.184 | 0.076 | 0.037 |
| 4                                                                                                                                                                                | 0.209                     | 0.290 | 0.219 | 0.158 | 0.125 |
| 5                                                                                                                                                                                | 0.123                     | 0.134 | 0.135 | 0.144 | 0.463 |
| Mirabegron 50 mg: month 1 to month 2                                                                                                                                             |                           |       |       |       |       |
| 1                                                                                                                                                                                | 0.866                     | 0.105 | 0.015 | 0.007 | 0.007 |
| 2                                                                                                                                                                                | 0.484                     | 0.361 | 0.096 | 0.033 | 0.026 |
| 3                                                                                                                                                                                | 0.305                     | 0.329 | 0.212 | 0.105 | 0.050 |
| 4                                                                                                                                                                                | 0.168                     | 0.247 | 0.231 | 0.199 | 0.154 |
| 5                                                                                                                                                                                | 0.089                     | 0.103 | 0.129 | 0.164 | 0.515 |
| Mirabegron 50 mg: month 2 to month 3                                                                                                                                             |                           |       |       |       |       |
| 1                                                                                                                                                                                | 0.850                     | 0.120 | 0.015 | 0.008 | 0.008 |
| 2                                                                                                                                                                                | 0.454                     | 0.394 | 0.091 | 0.034 | 0.026 |
| 3                                                                                                                                                                                | 0.284                     | 0.357 | 0.201 | 0.109 | 0.050 |
| 4                                                                                                                                                                                | 0.156                     | 0.267 | 0.218 | 0.206 | 0.152 |
| 5                                                                                                                                                                                | 0.083                     | 0.112 | 0.122 | 0.170 | 0.512 |
| Tolterodine 4 mg ER: baseline to month 1                                                                                                                                         |                           |       |       |       |       |
| 1                                                                                                                                                                                | 0.884                     | 0.094 | 0.011 | 0.005 | 0.006 |
| 2                                                                                                                                                                                | 0.532                     | 0.349 | 0.074 | 0.022 | 0.023 |

| <b>Supplementary Table 3.</b> Transition probabilities between incontinence severity levels for the general OAB population based on logistic regression analysis of SCORPIO data |       |       |       |       |       |
|----------------------------------------------------------------------------------------------------------------------------------------------------------------------------------|-------|-------|-------|-------|-------|
| 3                                                                                                                                                                                | 0.359 | 0.341 | 0.175 | 0.077 | 0.048 |
| 4                                                                                                                                                                                | 0.211 | 0.273 | 0.203 | 0.157 | 0.157 |
| 5                                                                                                                                                                                | 0.113 | 0.115 | 0.114 | 0.130 | 0.528 |
| Tolterodine 4 mg ER: month 1 to month 2                                                                                                                                          |       |       |       |       |       |
| 1                                                                                                                                                                                | 0.871 | 0.098 | 0.014 | 0.007 | 0.009 |
| 2                                                                                                                                                                                | 0.497 | 0.346 | 0.091 | 0.033 | 0.033 |
| 3                                                                                                                                                                                | 0.313 | 0.316 | 0.201 | 0.106 | 0.064 |
| 4                                                                                                                                                                                | 0.168 | 0.231 | 0.213 | 0.196 | 0.192 |
| 5                                                                                                                                                                                | 0.080 | 0.087 | 0.107 | 0.146 | 0.580 |
| Tolterodine 4 mg ER: month 2 to month 3                                                                                                                                          |       |       |       |       |       |
| 1                                                                                                                                                                                | 0.871 | 0.098 | 0.014 | 0.007 | 0.009 |
| 2                                                                                                                                                                                | 0.497 | 0.346 | 0.091 | 0.033 | 0.033 |
| 3                                                                                                                                                                                | 0.313 | 0.316 | 0.201 | 0.106 | 0.064 |
| 4                                                                                                                                                                                | 0.168 | 0.231 | 0.213 | 0.196 | 0.192 |
| 5                                                                                                                                                                                | 0.080 | 0.087 | 0.107 | 0.146 | 0.580 |
| No treatment: n months to (n+1) months                                                                                                                                           |       |       |       |       |       |
| 1                                                                                                                                                                                | 0.856 | 0.113 | 0.014 | 0.008 | 0.010 |
| 2                                                                                                                                                                                | 0.467 | 0.379 | 0.086 | 0.035 | 0.033 |
| 3                                                                                                                                                                                | 0.293 | 0.343 | 0.190 | 0.110 | 0.064 |
| 4                                                                                                                                                                                | 0.156 | 0.250 | 0.201 | 0.203 | 0.190 |
| 5                                                                                                                                                                                | 0.052 | 0.070 | 0.093 | 0.167 | 0.618 |

### **Health state utilities according to symptom severity**

Utility values according to symptom severity were derived from EQ-5D index scores, based on the UK time trade-off tariff, collected in the SCORPIO trial. A linear regression model was estimated, with adjustments for age, sex, and country (as a random effect), accounting for repeated measures by patient:

$$Utility = \beta_0 + \beta_1 ClassMict + \beta_2 ClassInco + \beta_3 Age + \beta_4 Sex + \varepsilon_{patient} + \varepsilon_{country}$$

The model was estimated from all treatment arms of SCORPIO. We verified that there was no significant treatment effect independent of symptom severity. Supplementary Table 3 shows the parameter estimates for the general OAB population. For example, the coefficient for micturitions at level 1 is 0.06321: this means that the utility of patients with micturitions at level 1 is higher than the utility of patients with micturitions at level 5 by 0.0321. Health utilities according to symptom severity for subgroups were obtained in the same way.

| <b>Effect</b>                      | <b>Class/level</b> | <b>Estimates</b> | <b>Sensitivity analyses (95% CIs)</b> |
|------------------------------------|--------------------|------------------|---------------------------------------|
| <b>Intercept</b>                   |                    | 0.7838           |                                       |
| <b>Age</b>                         |                    | -0.00041         |                                       |
| <b>Micturition severity level</b>  | 1                  | 0.06321          | 0.0453, 0.0811                        |
|                                    | 2                  | 0.04224          | 0.0258, 0.0587                        |
|                                    | 3                  | 0.02042          | 0.0045, 0.0363                        |
|                                    | 4                  | 0.01039          | -0.0316                               |
|                                    | 5                  | 0                |                                       |
| <b>Incontinence severity level</b> | 1                  | 0.05859          | 0.0422, 0.0749                        |
|                                    | 2                  | 0.04367          | 0.0271, 0.0602                        |
|                                    | 3                  | 0.03141          | 0.0142, 0.0486                        |
|                                    | 4                  | 0.01282          | -0.0369                               |
|                                    | 5                  | 0                |                                       |
| <b>Sex</b>                         | F                  | -0.04412         |                                       |
|                                    | M                  | 0                |                                       |
